# Supplementary material
Source: publisher figshare collection journal article supplement (https://tandf.figshare.com/ndownloader/files/13592897)
Supplement: Supplementary file 1 [file 13592897]

**Appendix A: Chinese Recovery Self-Assessment Service User version (CRSA-SU)**

**精神健康復元服務 - 使用者意見調查問卷**

就你對________________服務的認識，請圈出最能表達你對以下句子的同意程度。

“1”代表極之不同意；“5”代表極之同意。你也可以圈出1至5之間的數字以代表相對的同意程度；或根據你的認識，選擇圈出「不適用」或「不知道」。

| **題目** | | 極之  不同意 |  | | | 極之  同意 | 不適用 | 不知道 |
| --- | --- | --- | --- | --- | --- | --- | --- | --- |
| 1. | 使用這服務時，職員歡迎我及使我感到舒服。 | 1 | 2 | 3 | 4 | 5 | 不適用 | 不知道 |
| 2. | 這裡的環境(例如大堂、等候室等)令我感到親切及被尊重。 | 1 | 2 | 3 | 4 | 5 | 不適用 | 不知道 |
| 3. | 職員鼓勵我對自己及我的「復元」進度抱有希望及高的期望。  「復元」不等同於康復。它是指雖然精神疾病可能仍然為自己帶來一定程度的限制及影響，但仍然能根據自己的選擇去發展自己的潛能，並過著滿足、有希望、有貢獻及有意義的生活。 | 1 | 2 | 3 | 4 | 5 | 不適用 | 不知道 |
| 4. | 如果我想的話，我可以更換我的治療師或個案經理。 | 1 | 2 | 3 | 4 | 5 | 不適用 | 不知道 |
| 5. | 如果我想的話，我可以很容易地查閱我的治療記錄。 | 1 | 2 | 3 | 4 | 5 | 不適用 | 不知道 |
| 6. | 職員不會以威脅、收買，或以其他施壓手段促使我做一些他們期望的事情。 | 1 | 2 | 3 | 4 | 5 | 不適用 | 不知道 |
| 7. | 職員相信我能夠「復元」。  「復元」不等同於康復。它是指雖然精神疾病可能仍然為自己帶來一定程度的限制及影響，但仍然能根據自己的選擇去發展自己的潛能，並過著滿足、有希望、有貢獻及有意義的生活。 | 1 | 2 | 3 | 4 | 5 | 不適用 | 不知道 |
| 8. | 職員相信我有能力去處理自己的病徵。 | 1 | 2 | 3 | 4 | 5 | 不適用 | 不知道 |
| 9. | 職員相信我可以為自己生活上的事情作出選擇，例如有關住在哪裏、何時去工作、和哪些人做朋友等等。 | 1 | 2 | 3 | 4 | 5 | 不適用 | 不知道 |
| 10. | 職員聆聽並尊重我對自己的治療和護理所作的決定。 | 1 | 2 | 3 | 4 | 5 | 不適用 | 不知道 |
| 11. | 職員定期了解我的興趣和我想在社區裡做的事情。 | 1 | 2 | 3 | 4 | 5 | 不適用 | 不知道 |
| 12. | 職員鼓勵我嘗試承受風險和探求新的事物。 | 1 | 2 | 3 | 4 | 5 | 不適用 | 不知道 |
| 13. | 這服務能具體地配合我獨特的文化背景和人生經驗。 | 1 | 2 | 3 | 4 | 5 | 不適用 | 不知道 |
| 14. | 只要我願意，我有機會去討論自己心靈上的需要和興趣。 | 1 | 2 | 3 | 4 | 5 | 不適用 | 不知道 |
| 15. | 只要我願意，我有機會去討論自己的性需要和興趣。 | 1 | 2 | 3 | 4 | 5 | 不適用 | 不知道 |
| 16. | 除了管理病徵或保持病情穩定以外，職員幫助我去發展和計劃一些人生目標 (例如: 就業、教育、健康、和家人與朋友保持聯絡、嗜好) 。 | 1 | 2 | 3 | 4 | 5 | 不適用 | 不知道 |
| 17. | 職員協助我去尋找工作。 | 1 | 2 | 3 | 4 | 5 | 不適用 | 不知道 |
| 18. | 除與精神健康/成癮行為有關的活動外，職員也幫助我去參與其他活動，例如宗教活動、成人教育、運動、或嗜好。 | 1 | 2 | 3 | 4 | 5 | 不適用 | 不知道 |
| 19. | 職員會幫助我邀請一些對我重要的人士(例如家人、朋友、神職人員、或僱主)參與我的復元及治療計劃。 | 1 | 2 | 3 | 4 | 5 | 不適用 | 不知道 |
| 20. | 職員介紹我認識一些在復元過程中的人士，讓他/他們成為我的榜樣及導師。 | 1 | 2 | 3 | 4 | 5 | 不適用 | 不知道 |
| 21. | 職員幫助我接觸「自助組織」、「朋輩支援服務」或「服務使用者倡導組織及服務」。 | 1 | 2 | 3 | 4 | 5 | 不適用 | 不知道 |
| 22. | 職員幫助我尋找方法去回饋社會(例如：義工，社區服務，鄰社守望/清潔)。 | 1 | 2 | 3 | 4 | 5 | 不適用 | 不知道 |
| 23. | 這裡鼓勵我去協助職員發展新的活動和服務。 | 1 | 2 | 3 | 4 | 5 | 不適用 | 不知道 |
| 24. | 我被鼓勵去參與有關這服務和提供服務人員的評核。 | 1 | 2 | 3 | 4 | 5 | 不適用 | 不知道 |
| 25. | 只要我願意，我被鼓勵出席機構諮詢委員會和/或管理會議。 | 1 | 2 | 3 | 4 | 5 | 不適用 | 不知道 |
| 26. | 職員告訴我怎樣可以完成或退出這個服務。 | 1 | 2 | 3 | 4 | 5 | 不適用 | 不知道 |
| 27. | 職員幫助我跟進有關達成個人目標的進度。 | 1 | 2 | 3 | 4 | 5 | 不適用 | 不知道 |
| 28. | 職員盡力幫助我去實踐個人目標。 | 1 | 2 | 3 | 4 | 5 | 不適用 | 不知道 |
| 29. | 我正參與/可以參與這機構職員的培訓和教育活動。 | 1 | 2 | 3 | 4 | 5 | 不適用 | 不知道 |
| 30. | 職員會了解並回應我的文化體驗、興趣、和關注的事情。 | 1 | 2 | 3 | 4 | 5 | 不適用 | 不知道 |
| 31. | 職員對社區提供的興趣小組和活動有豐富認識。 | 1 | 2 | 3 | 4 | 5 | 不適用 | 不知道 |
| 32. | 這裡的職員來自多元化的文化背景、種族、生活方式和興趣。 | 1 | 2 | 3 | 4 | 5 | 不適用 | 不知道 |

**謝謝你的意見！**

Translated with permission from Recovery Self-Assessment-R (Person in Recovery Version)

O’Connel, Tondora, Kidd, Stayner, Hawkins, and Davidson (2007)

If you wish to use the Chinese Recovery Self-Assessment Revised (CRSA-R) Person in Recovery version in practice or research, please contact: June CHAO, email: [chaoyw@ha.org.hk](mailto:chaoyw@ha.org.hk)
